# Supplementary material
Source: publisher figshare collection journal article supplement (https://acs.figshare.com/ndownloader/files/22813613)
Supplement: Supplementary file 1 [file 22813613]

# Supporting Information

## Size-Tunable Synthesis of Palladium Nanoparticles Confined within Topologically Distinct Metal–Organic Frameworks for Catalytic Dehydrogenation of Methanol

Yu-Hsiang Wang,<sup>a,b</sup> Cheng-Hsun Chuang,<sup>c</sup> Te-An Chiu,<sup>a,b</sup> Chung-Wei Kung,<sup>c\*</sup> and Wen-Yueh Yu<sup>a,b\*</sup>

<sup>a</sup> Department of Chemical Engineering, National Taiwan University, Taipei, Taiwan, 10617.

<sup>b</sup> Advanced Research Center for Green Materials Science and Technology, Taipei, Taiwan, 10617.

<sup>c</sup> Department of Chemical Engineering, National Cheng Kung University, Tainan City, Taiwan, 70101.

\* Corresponding authors: [cwkung@mail.ncku.edu.tw](mailto:cwkung@mail.ncku.edu.tw) (C.-W. Kung),  
[wenyueh@ntu.edu.tw](mailto:wenyueh@ntu.edu.tw) (W.-Y. Yu)

**Table S1.** Selected summary of catalytic performance for methanol dehydrogenation over Pd-based catalysts in this work and reported in literatures.

| Catalyst                                            | Prep. Method <sup>a</sup> | Pd loading (wt%) | Rxn temp. (°C) | H <sub>2</sub> production rate (mmol g-Pd <sup>-1</sup> min <sup>-1</sup> ) | H <sub>2</sub> -TOF (h <sup>-1</sup> ) | Ref. |
|-----------------------------------------------------|---------------------------|------------------|----------------|-----------------------------------------------------------------------------|----------------------------------------|------|
| Pd@UiO-66                                           | SIM                       | 5.2              | 225            | 137                                                                         | 874 <sup>d</sup>                       | [1]  |
|                                                     |                           |                  | 200            | 72                                                                          | 459 <sup>d</sup>                       | [1]  |
| Pd@NU-902                                           | SIM                       | 2.6              | 225            | 102                                                                         | 651 <sup>d</sup>                       | [1]  |
|                                                     |                           |                  | 200            | 46                                                                          | 291 <sup>d</sup>                       | [1]  |
| Pd@PCN-222                                          | SIM                       | 1.3              | 225            | 87                                                                          | 556 <sup>d</sup>                       | [1]  |
|                                                     |                           |                  | 200            | 41                                                                          | 259 <sup>d</sup>                       | [1]  |
| Pd/ZrO <sub>2</sub>                                 | IMP                       | 5.0              | 200            | 7 <sup>b</sup>                                                              | 43                                     | [2]  |
| Pd/ZrO <sub>2</sub>                                 | CP                        | 10.0             | 200            | 10 <sup>b</sup>                                                             | 65                                     | [2]  |
| Pd/ZrO <sub>2</sub>                                 | CP                        | 15.0             | 200            | 11 <sup>b</sup>                                                             | 68                                     | [2]  |
| Pd/Pr <sub>2</sub> O <sub>3</sub>                   | CP                        | 15.0             | 200            | 16 <sup>b</sup>                                                             | 101                                    | [2]  |
| Pd/CeO <sub>2</sub>                                 | CP                        | 15.0             | 200            | 15 <sup>b</sup>                                                             | 94                                     | [2]  |
| Pd/TiO <sub>2</sub>                                 | CP                        | 15.0             | 200            | 5 <sup>b</sup>                                                              | 29                                     | [2]  |
| Pd/ZrO <sub>2</sub>                                 | DP                        | 2.0              | 200            | 54 <sup>c</sup>                                                             | 346 <sup>c,d</sup>                     | [3]  |
| Pd/ZrO <sub>2</sub>                                 | IMP                       | 2.0              | 200            | 21 <sup>c</sup>                                                             | 133 <sup>c,d</sup>                     | [3]  |
| Pd/CeO <sub>2</sub> -Al <sub>2</sub> O <sub>3</sub> | SG                        | 5.0              | 225            | 30 <sup>c</sup>                                                             | 192 <sup>c,d</sup>                     | [4]  |
| Pd/Al <sub>2</sub> O <sub>3</sub>                   | ALD                       | 1.6              | 250            | 203                                                                         | 1300                                   | [5]  |

<sup>a</sup> Abbreviations for preparation methods including solvothermal deposition in MOF (SIM), impregnation (IMP), coprecipitation (CP), deposition-precipitation (DP), sol-gel (SG), and atomic layer deposition (ALD). <sup>b</sup> calculated from the reported values of H<sub>2</sub>-TOF and Pd loading. <sup>c</sup> calculated from reported methanol conversion assuming 100% H<sub>2</sub> selectivity. <sup>d</sup> normalized by total number of Pd atoms in catalysts.

[1] This work.

[2] Y. Usami, K. Kagawa, M. Kawazoe, Y. Matsumura, H. Sakurai and M. Haruta, *Appl. Catal. A-Gen.*, 1998, **171**, 123-130.

[3] Y. Matsumura, M. Okumura, Y. Usami, K. Kagawa, H. Yamashita, M. Anpo and M. Haruta, *Catal. Lett.*, 1997, **44**, 189-191.

[4] J. C. Brown and E. Gulari, *Catal. Commun.*, 2004, **5**, 431-436

[5] H. Feng, J. W. Elam, J. A. Libera, W. Setthapun and P. C. Stair, *Chem. Mater.*, 2010, **22**, 3133-3142.

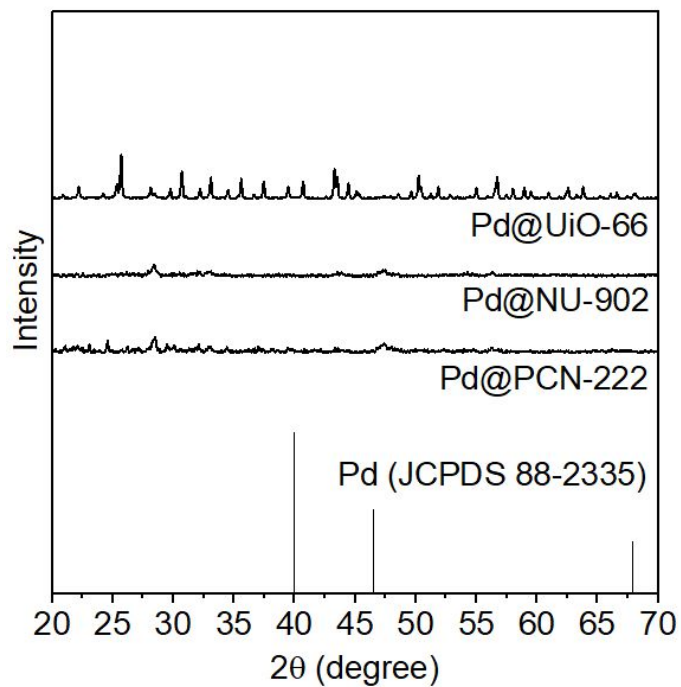

**Figure S1.** PXRD patterns of Pd@Zr-MOFs.

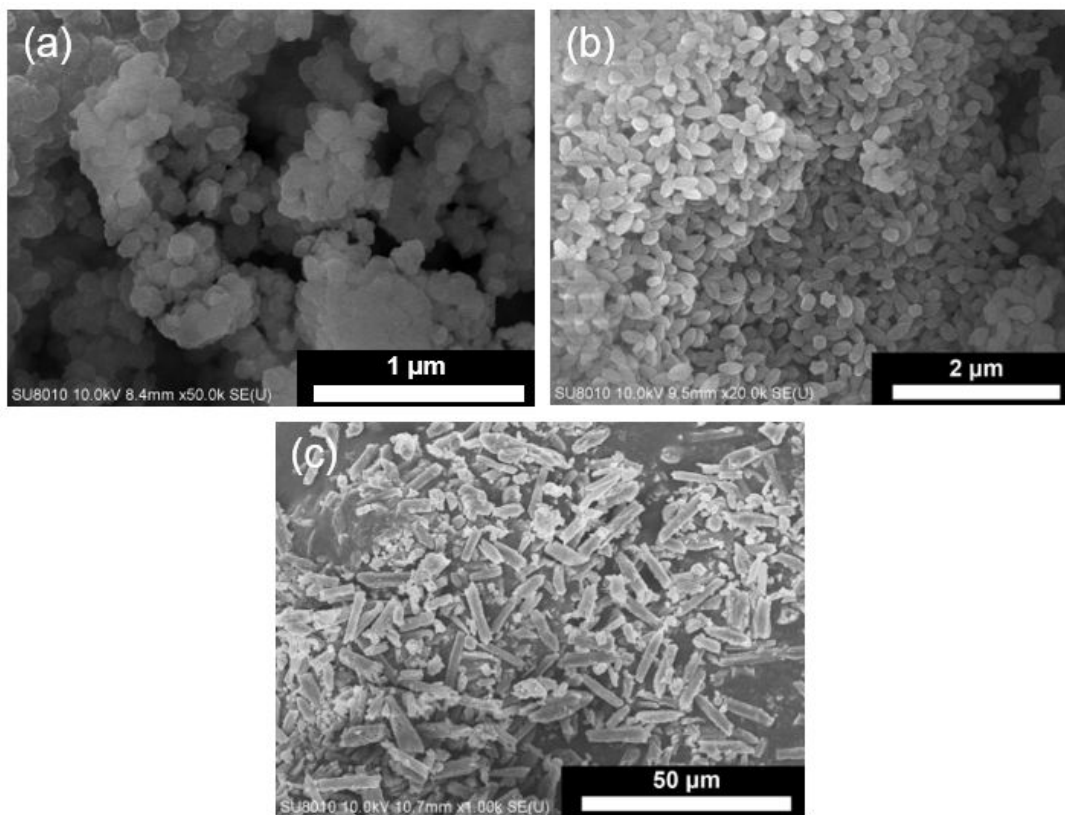

**Figure S2.** SEM images of (a) UiO-66, (b) NU-902, and (c) PCN-222.

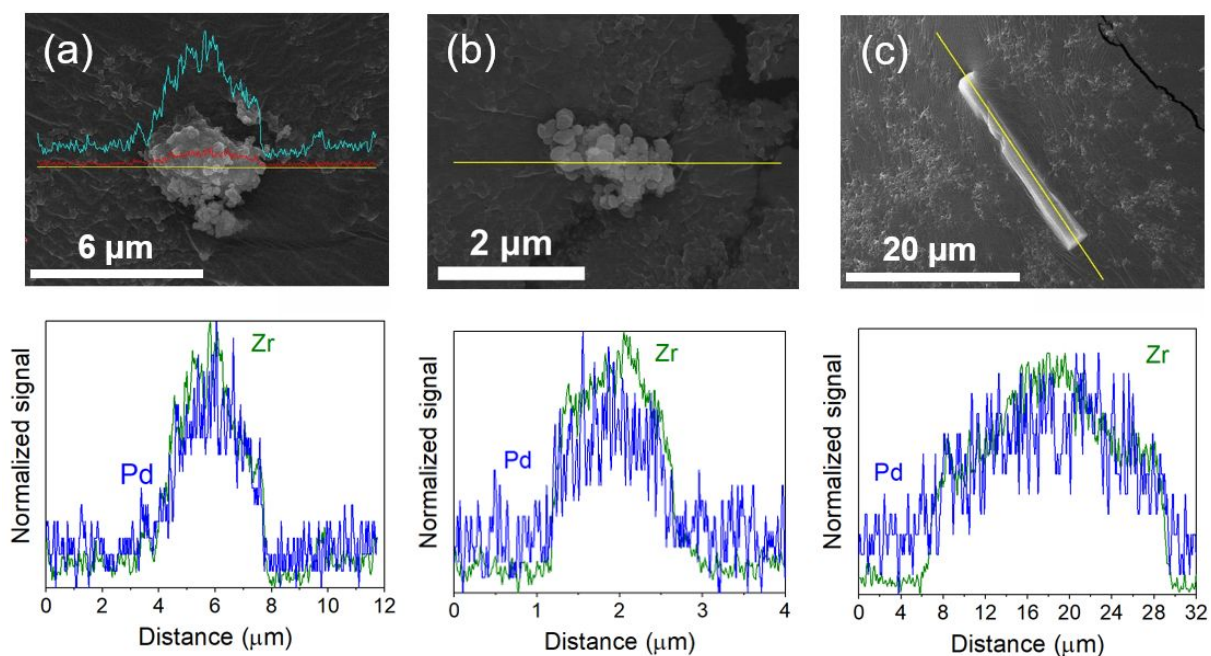

**Figure S3.** EDS line scans (yellow lines) and normalized EDS signals of (a) Pd@UiO-66, (b) Pd@NU-902, and (c) Pd@PCN-222.

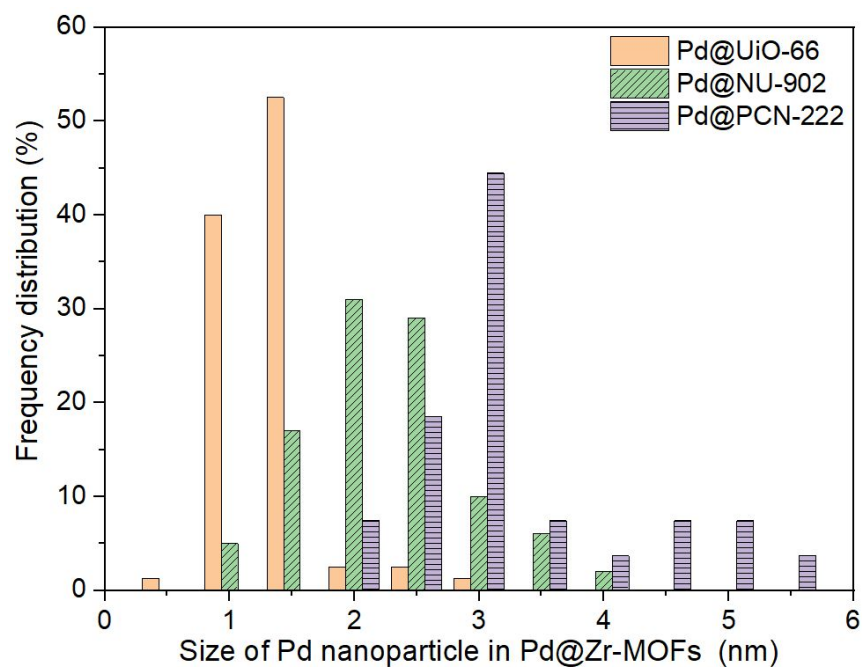

**Figure S4.** Size distribution of Pd nanoparticles in Pd@Zr-MOFs.

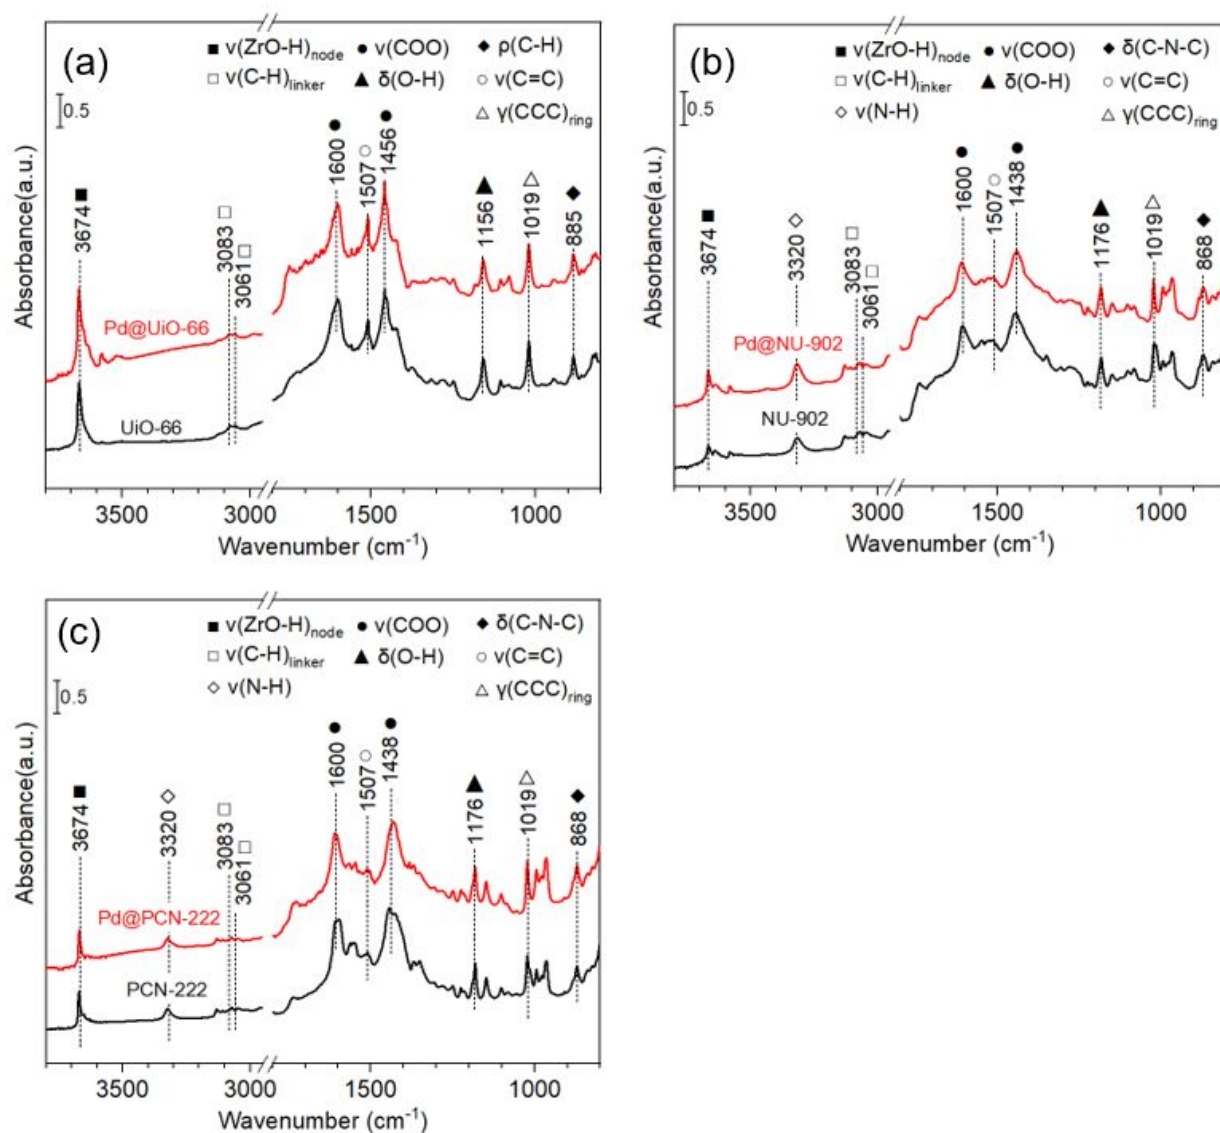

**Figure S5.** Infrared spectra of (a) UiO-66, (b) NU-902, and (c) PCN-222 before and after Pd incorporation by solvothermal deposition in MOFs (SIM) technique.

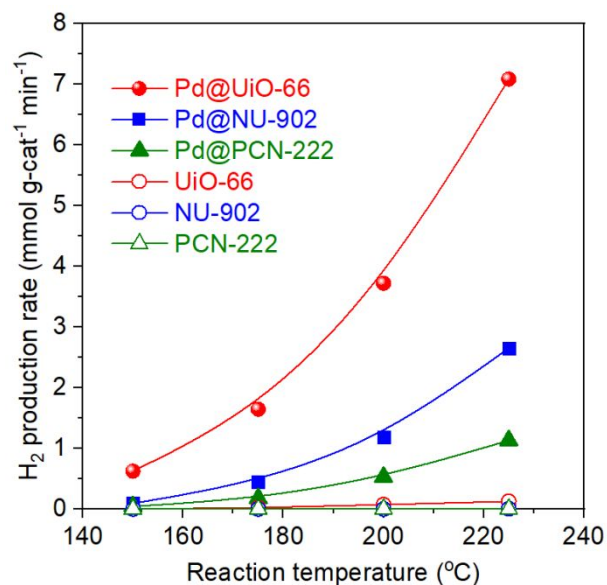

**Figure S6.** Catalytic methanol dehydrogenation over pristine Zr-MOFs and Pd@Zr-MOFs.

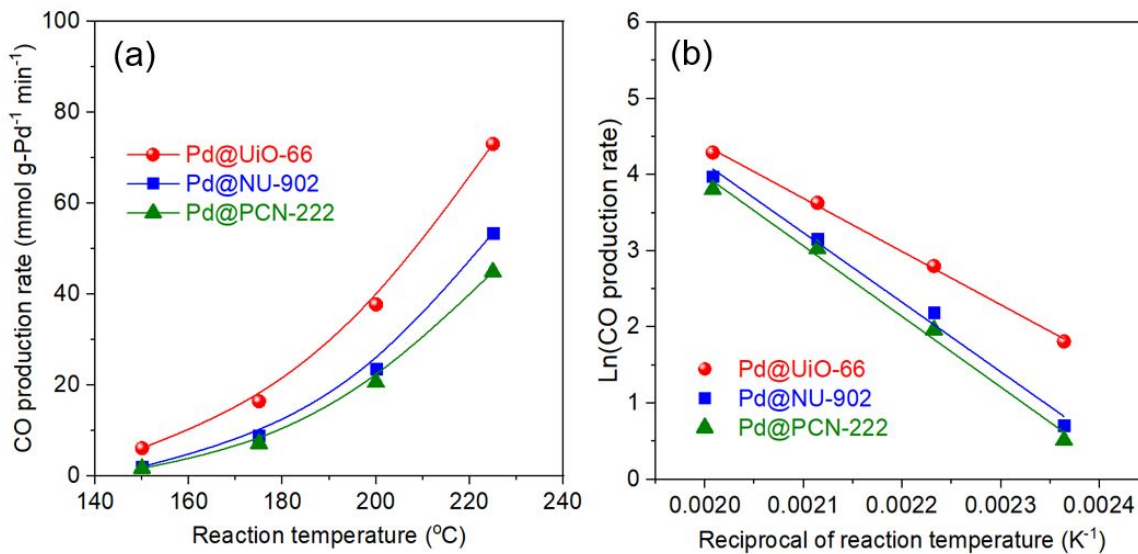

**Figure S7.** Catalytic methanol decarbonylation over Pd@Zr-MOFs. (a) CO production rate from methanol decomposition as a function of reaction temperature, and (b) Arrhenius plot for data in (a). The activation energies for Pd@UiO-66, Pd@NU-902, Pd@PCN-222 are 58, 76, and 77 kJ mol<sup>-1</sup>.



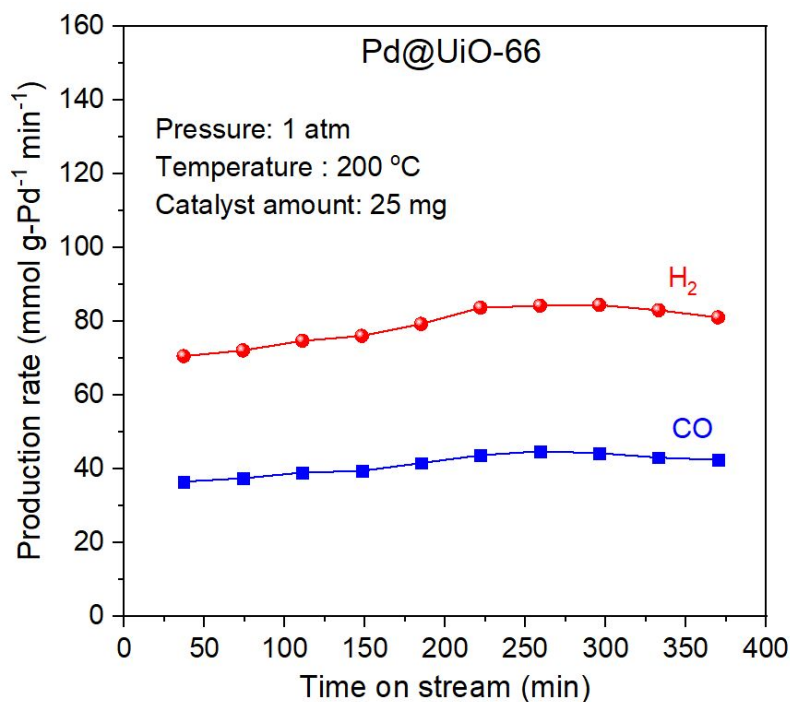

**Figure S8.** Time on stream of H<sub>2</sub> and CO production rates from methanol dehydrogenation over Pd@UiO-66 at 200 °C.

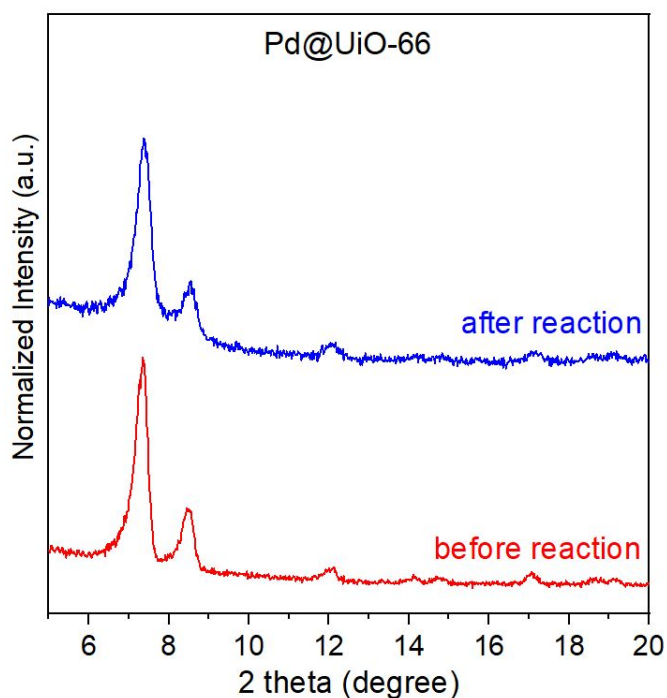

**Figure S9.** PXRD patterns of Pd@UiO-66 before and after catalytic reaction. Reaction condition: 25 mg of catalyst, methanol inlet flow (1 mL/h), methanol: N<sub>2</sub> = 1:4 (molar ratio), N<sub>2</sub> flow rate (40 mL/min), time on stream reaction at 200 °C for 6 hours.

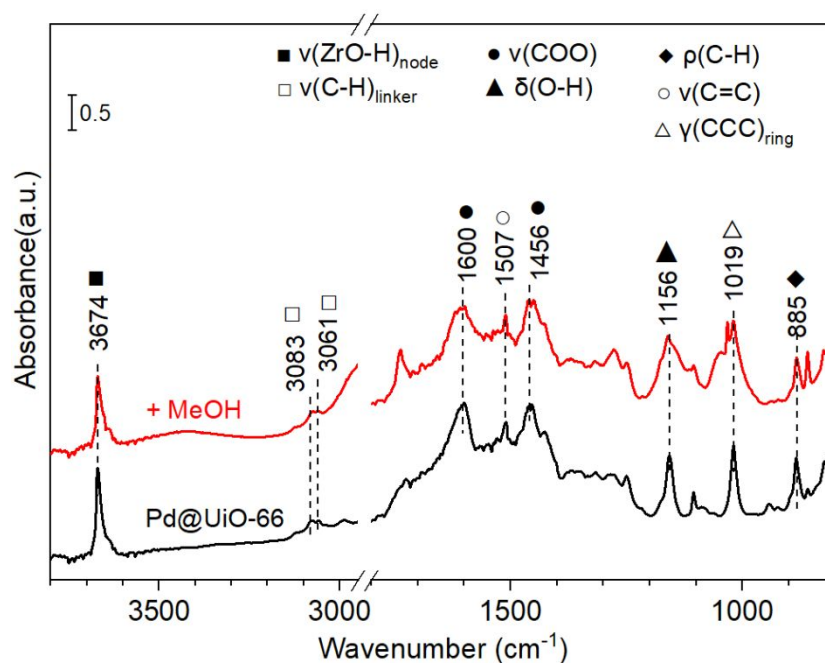

**Figure S10.** Infrared spectra of Pd@UiO-66 before and after exposing to methanol for 60 min at 200 °C.

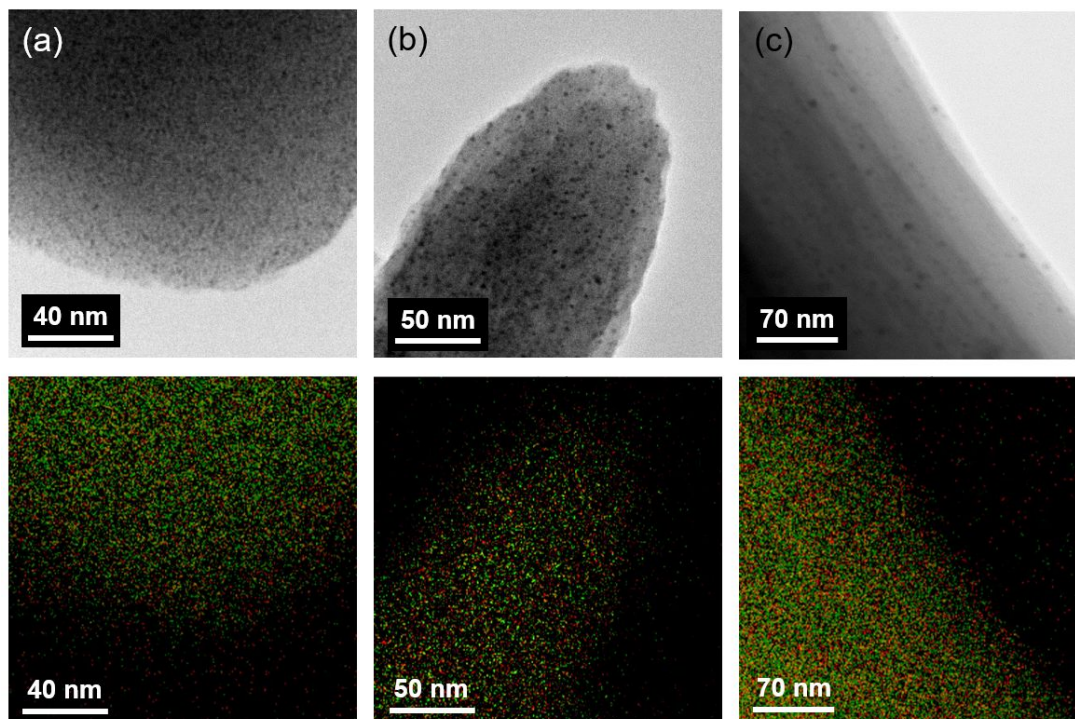

**Figure S11.** TEM images and elemental mapping (Red: Pd; Green: Zr) of (a) Pd@UiO-66, (b) Pd@NU-902, and (c) Pd@PCN-222 after catalytic reaction. Reaction condition: 25 mg of catalyst, methanol inlet flow (1 mL/h), methanol: N<sub>2</sub> = 1:4 (molar ratio), N<sub>2</sub> flow rate (40 mL/min), time on stream reaction at 200 °C for 6 hours.



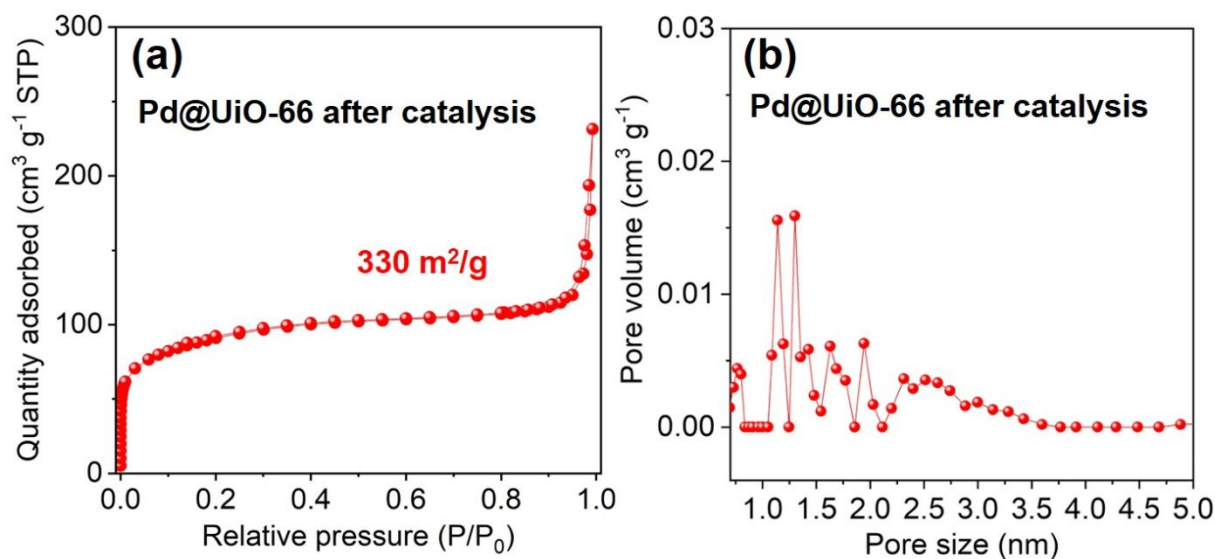

**Figure S12.** (a) Nitrogen adsorption-desorption isotherm and (b) DFT pore size distribution of Pd@UiO-66 after catalytic reaction. Reaction condition: 25 mg of catalyst, methanol inlet flow (1 mL/h), methanol: N<sub>2</sub> = 1:4 (molar ratio), N<sub>2</sub> flow rate (40 mL/min), time on stream reaction at 200 °C for 6 hours. The calculated BET surface area is also shown in (a).

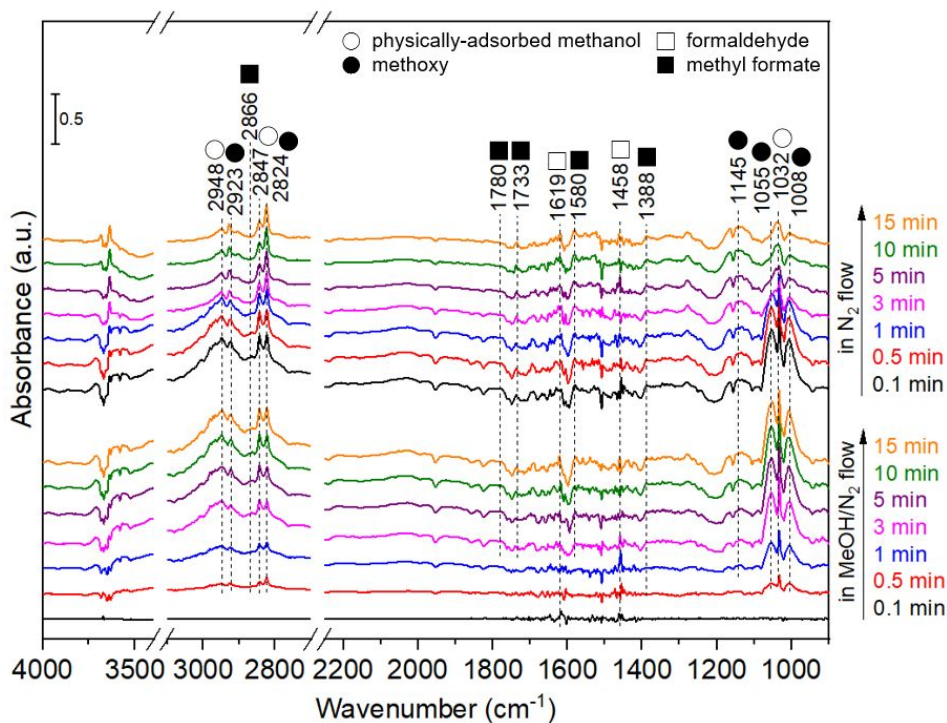

**Figure S13.** In-situ DRIFTS spectra of UiO-66 in the flow of methanol/N<sub>2</sub> followed by N<sub>2</sub> at 150 °C.

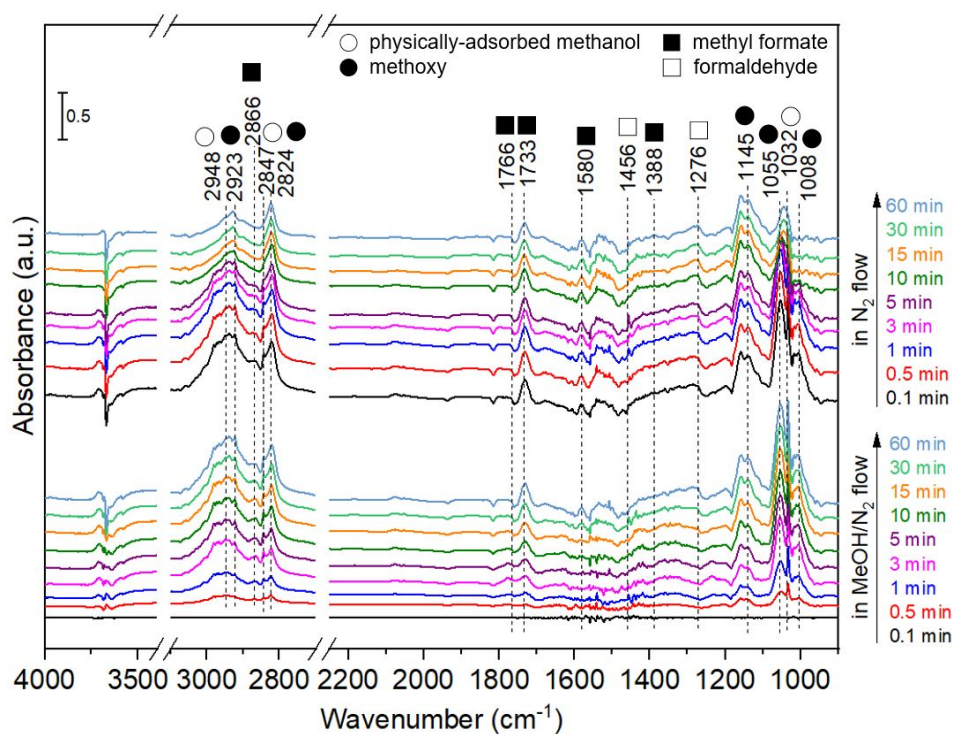

**Figure S14.** In-situ DRIFTS spectra of Pd@NU-902 in the flow of methanol/N<sub>2</sub> followed by N<sub>2</sub> at 150 °C.

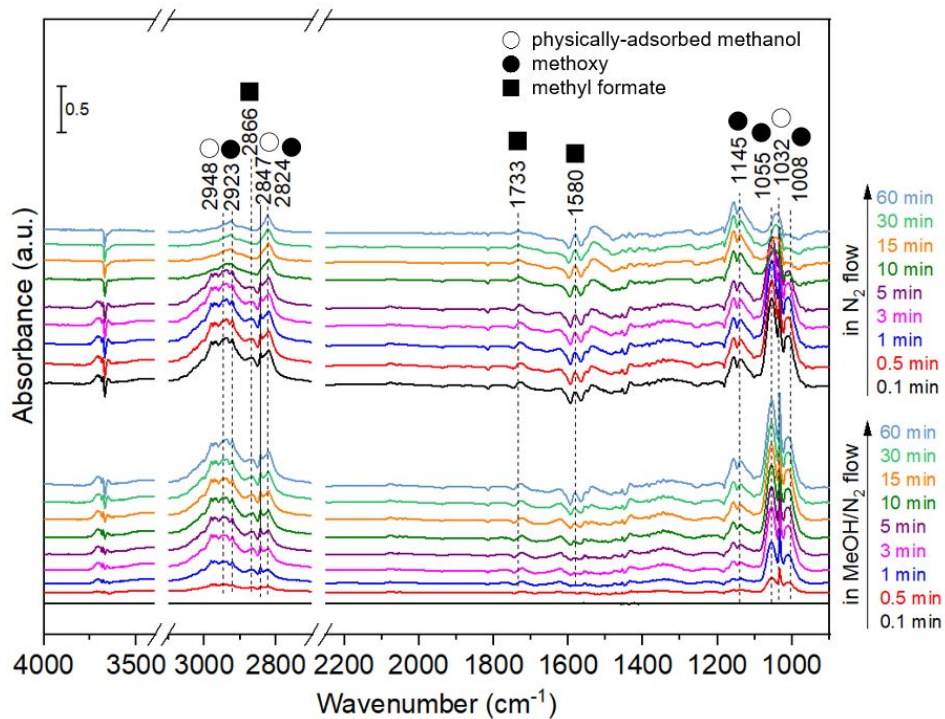

**Figure S15.** In-situ DRIFTS spectra of Pd@PCN-222 in the flow of methanol/N<sub>2</sub> followed by N<sub>2</sub> at 150 °C.

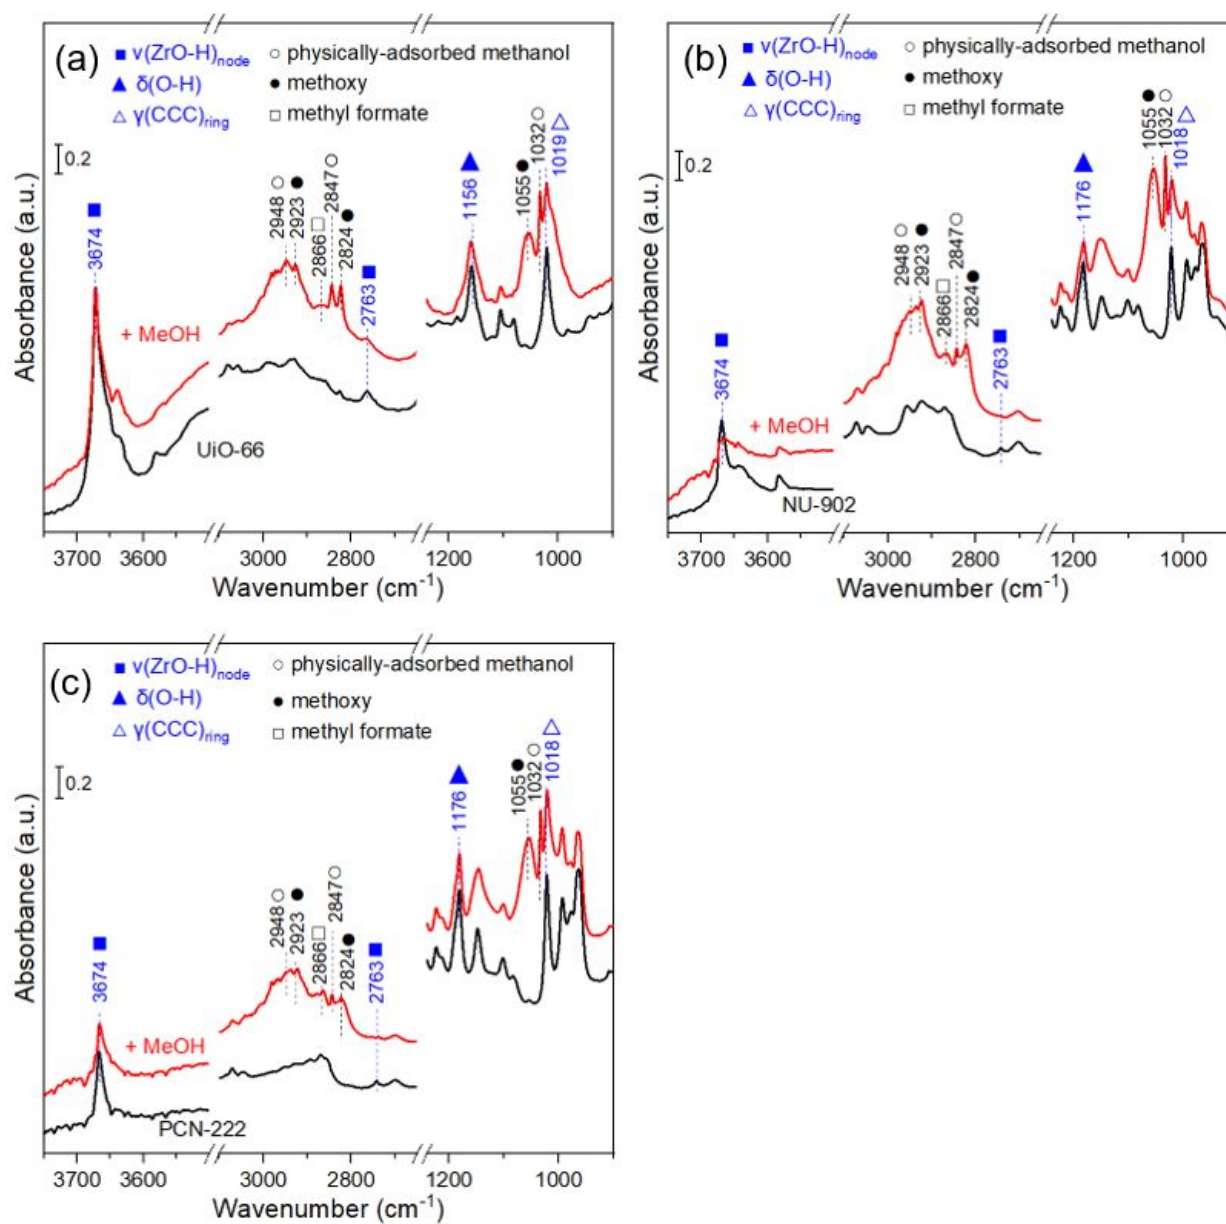

**Figure S16.** Infrared spectra of (a) UiO-66, (b) NU-902, and (c) PCN-222 before and after exposing to methanol at 150 °C for 15 min.
